# Supplementary material for: Development of a mutation hotspot detection kit for the phenylalanine hydroxylase gene by ARMS-PCR combined with fluorescent probe technology
Source: Oxford University Press journal article supplement (doi:10.1042/bsr20201660), 2021-02-01
Supplement: bsr-2020-1660_supp.pdf [file bsr-2020-1660_supp.pdf]

### Supply1. The patient workflow

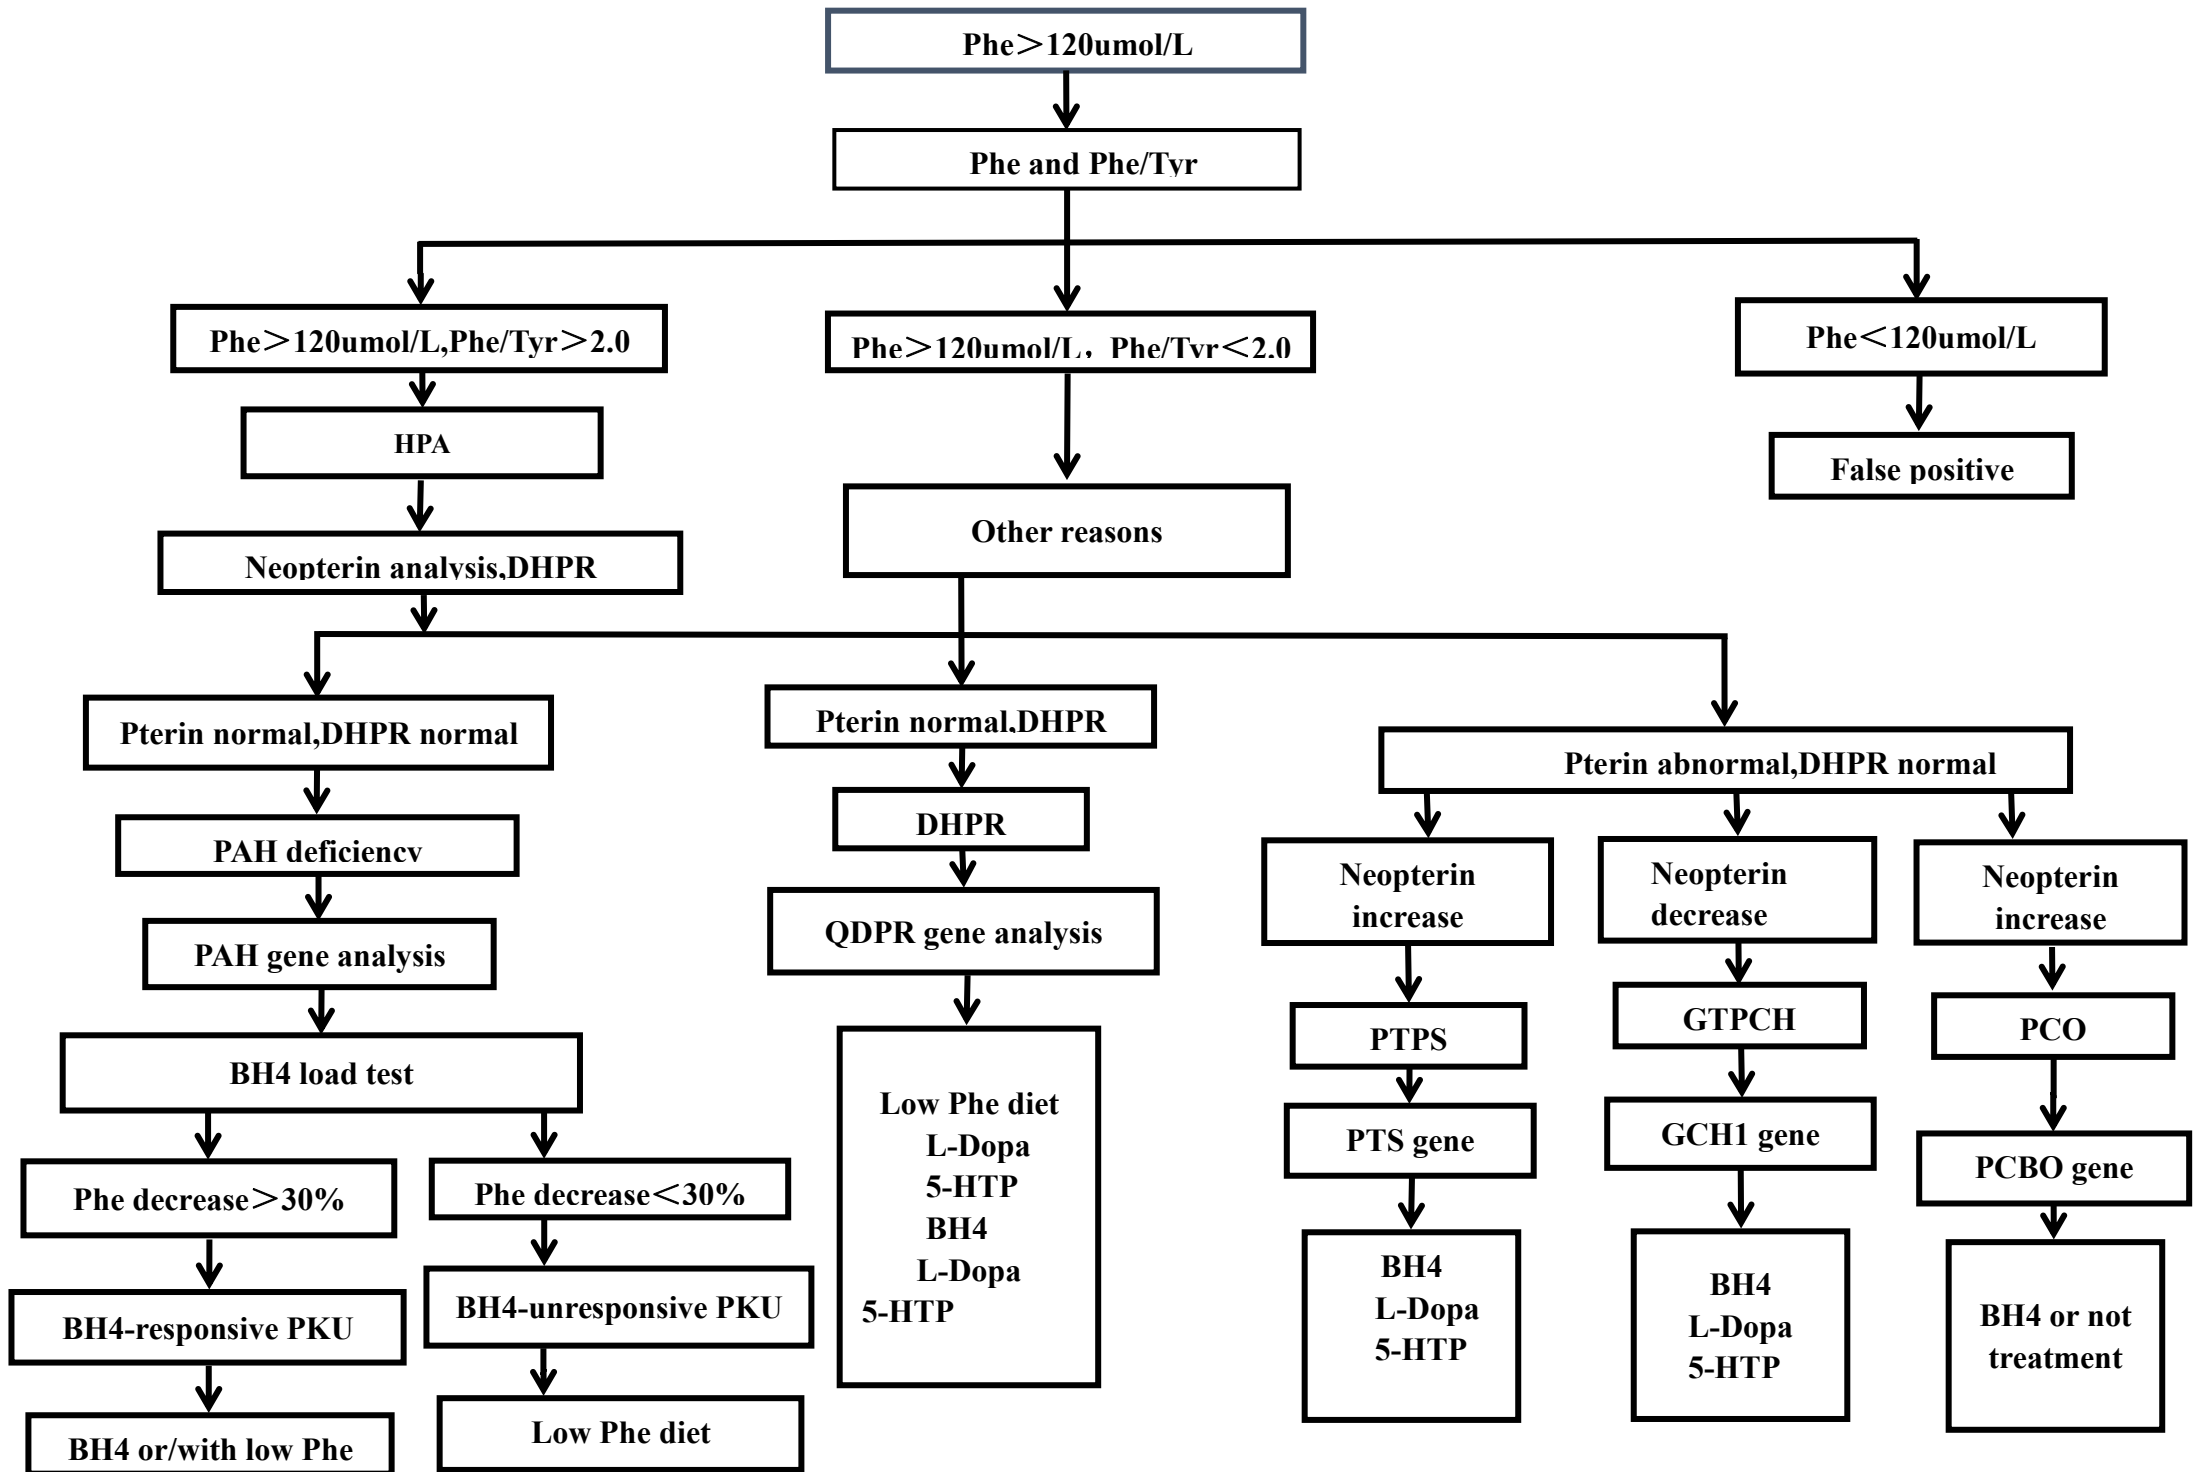

Supply 2 PCR primer sequences of 13 exons of PAH genes

| exon | primer (5'-3')           | Product length (bp) |
|------|--------------------------|---------------------|
| 1    | F:CCTCCTGCGTCAGGACAAC    | 340                 |
|      | R:TTCGTTGGAAGCTGATGAGAA  |                     |
| 2    | F:TTGCTTTGTCCATGGAGGTTT  | 251                 |
|      | R:ACAGGATCTGGAACAGGCAGA  |                     |
| 3    | F:TGTGAACTAACTGCCCCACCT  | 495                 |
|      | R:TTGCTGTTATTTTGC GGAAGC |                     |
| 4    | F:GGGATCCCCACTTCTGATCTC  | 505                 |
|      | R:AACA ACTCTGCCAACTGCAGG |                     |

Supply 2 (continued)

| exon | primer (5'-3')           | Product length (bp) |
|------|--------------------------|---------------------|
| 5    | F:CCCCATTCAAAGCATT CATA  | 543                 |
|      | R:CATTCAAGATTT CAGGCCAGG |                     |
| 6    | F:CCCTTTCATGTGGGAAATCAA  | 481                 |
|      | R:GTGCTTGTAGGAATGCATGCA  |                     |
| 7    | F:ATGTCCCTGGGCAGTTATGTG  | 512                 |
|      | R:TGAGAACAGGAACAAGTGGCA  |                     |
| 8    | F:GGGAGCATGTCCACAGGAATA  | 470                 |
|      | R:TATGATCCCACCTGAAATGGG  |                     |
| 9    | F:GGCCACCCATCACCTTTTTAT  | 387                 |
|      | R:GTAGCCCTTGAAAACCCTTGG  |                     |
| 10   | F:TCCCTTCATCCAGTCAAGGTG  | 379                 |
|      | R:ATTCCAAGGCTGACCTATGCA  |                     |
| 11   | F:CAGCATTTGGGCTGTGATGTA  | 400                 |
|      | R:CGTTCTCTGTTGGAAGGTTGG  |                     |
| 12   | F:ACCCTGCTCTAGGGAGGTGTC  | 502                 |
|      | R:CCTCTCCATCCCTTCTACGCT  |                     |
| 13   | F:AGCCCACTTATCCCCTAGTGC  | 413                 |
|      | R: ATTTGGGACCTGCTTCATTCA |                     |

PAH: phenylalanine hydroxylase

Supply 3. Monochromatic fluorescent ARMS-PCR primer probe sequence

| Mutation site | sequence (5'-3')                          |
|---------------|-------------------------------------------|
| c.728G>A      | WF GCACTGGTTTCCGCCTCCG                    |
|               | MF GCACTGGTTTCCGCCTCCA                    |
|               | R GGCAACTGGTAGCTGGAGGA                    |
| c.1197A>T     | P FAM-TCCAAGCCCATGTATACCCCGAAC-BHQ1       |
|               | WF TTAATGATGCCAAGGAGAAAGTA                |
|               | MF TTAATGATGCCAAGGAGAAAGTT                |
| c.331C>T      | R ATGAGTGGCACCAGTCAGGAG                   |
|               | P FAM -TGACAAAGGTGAGCCACTAGCTCTGGG-BHQ1   |
|               | WF CCACTGTCCATGAGCTTTCAC                  |
| c.1068C>A     | MF CCACTGTCCATGAGCTTTCAT                  |
|               | R ACAGTGTGGAGTTACTTATGTTGCAAA             |
|               | P FAM -ACACAGGTAAGAATTAGAG-BHQ1           |
| c.611A>G      | WF TCACTTGGGGCCTACAGTAC                   |
|               | MF TCACTTGGGGCCTACAGTAA                   |
|               | R ACTCCGTGACAGTGTAATTTTGGGA               |
| c.1238G>C     | P FAM -CCCCTGGAGCTGGAGAAGACAGCC-BHQ1      |
|               | WF GTATAAAACCCATGCTTGCTA                  |
|               | MF GTATAAAACCCATGCTTGCTG                  |
| c.721C>T      | R CCTCAATCCTCCCCCAACTT                    |
|               | P FAM-CACATCAGGGTCAATGGCCCTGC-BHQ1        |
|               | WF CCTCGGCCCTTCTCAGTTCG                   |
| c.721C>T      | MF CCTCGGCCCTTCTCAGTTCC                   |
|               | R GGCGATGGTAGGGAAAGACA                    |
|               | P FAM -AGGCCACTCGGTTTCTCAGTAATCGAAGA-BHQ1 |
| c.721C>T      | WF ATCCCAGCTTGCACTGGTTTCC                 |
|               | MF ATCCCAGCTTGCACTGGTTTCT                 |
|               | R GGCAACTGGTAGCTGGAGGA                    |
| c.721C>T      | P FAM-TCCAAGCCCATGTATACCCCGAAC-BHQ1       |

ARMS-PCR: amplification refractory mutation system-polymerase chain reaction

| mutation site |    | sequence (5'-3')                            |
|---------------|----|---------------------------------------------|
| c.158G>A      | WF | GTGCATTGGCCAAAGTATTGCG                      |
|               | MF | GTGCATTGGCCAAAGTATTGCA                      |
|               | R  | CAAATTCAAATCTGCCTGTTCCA                     |
|               | P  | FAM-TCTTGGATAATGTCGTAGCAAACCTCCATGTTCT-BHQ1 |
| c.442-1G>A    | WF | AATCAGGTGTCTCTTTTCTCCTAG                    |
|               | MF | AATCAGGTGTCTCTTTTCTCCTAA                    |
|               | R  | GGCAGACTTACTGGCGGTAGTT                      |
|               | P  | FAM -CGGAAGCAGTYTGCTGACATTGCCT-BHQ1         |
| β-actin       | F  | GCATGGGTCAGAAGGATTCCT                       |
|               | R  | TCGTCCCAGTTGGTGACGAT                        |
|               | P  | FAM-CCTCACCCCTGAAGTACCCCATCGAGC-BHQ1        |

Supply 4. Bichromatic fluorescent ARMS-QPCR primer probe sequence

| mutation site |    | sequence (5'- 3')                    |
|---------------|----|--------------------------------------|
|               | MF | GCACTGGTTTCCGCCTCCA                  |
| c.728G>A      | R  | GGCAACTGGTAGCTGGAGGA                 |
|               | P  | FAM-TCCAAGCCCATGTATACCCCCGAAC-BHQ1   |
|               | MF | GTATAAAACCCATGCTTGCTG                |
| c.1238G>C     | R  | CCTCAATCCTCCCCAACTT                  |
|               | P  | VIC-CACATCAGGGTCAATGGCCCTGC-BHQ1     |
|               | MF | TTAATGATGCCAAGGAGAAAGTT              |
| c.331C>T      | R  | ATGAGTGGCACCAGTCAGGAG                |
|               | P  | FAM -TGACAAAGGTGAGCACTAGCTCTGGG-BHQ1 |
|               | MF | CCTCGGCCCTTCTCAGTTCC                 |
| c.1197A>T     | R  | GGCGATGGTAGGGAAAGACA                 |
|               | P  | VIC -AGGCCACTCGGTTTCTTAATCGAAGA-BHQ1 |
|               | MF | TCACTTGGGGCCTACAGTAA                 |
| c.611A>G      | R  | ACTCCGTGACAGTGTAATTTTGA              |
|               | P  | FAM -CCCCTGGAGCTGGAGAAGACAGCC-BHQ1   |

(continued)

| mutation site       |    | sequence (5'- 3')                      |
|---------------------|----|----------------------------------------|
|                     | MF | CCACTGTCCATGAGCTTTCAT                  |
| c.1068C>A           | R  | ACAGTGTGGAGTTACTTATGTTGCAA             |
|                     | P  | VIC -ACACAGGTAAGAATTAGAG-BHQ1          |
|                     | MF | ATCCCAGCTTGCACTGGTTTCT                 |
| c.721C>T            | R  | GGCAACTGGTAGCTGGAGGA                   |
|                     | P  | FAM-TCCAAGCCCATGTATACCCCCGAAC-BHQ1     |
|                     | MF | GTGCATTGGCCAAAGTATTGCA                 |
| c.158G>A            | R  | CAAATTCAAATCTGCCTGTTCCA                |
|                     | P  | VIC-TCTTGGATAATGTAGCACTTCCATGTTCT-BHQ1 |
|                     | MF | AATCAGGTGTCTCTTTTCTCCTAA               |
| c.442-1G>A          | R  | GGCAGACTTACTGGCGGTAGTT                 |
|                     | P  | FAM -CGGAAGCAGTYTGCTGACATTGCCT-BHQ1    |
|                     | F  | GCATGGGTCAGAAGGATTCTT                  |
| gene $\beta$ -actin | R  | TCGTCCCAGTTGGTGACGAT                   |
|                     | P  | VIC -CCTCACCTGAAGTACCCCATCGAGC-BHQ1    |

Note: MF : Mutant upstream primer; P : probe; R: Reverse primer; F: Forward primer.

**Supply5.**

**Supply5.1** Monochromatic fluorescence reaction system

| composition        | The dosage |
|--------------------|------------|
| 10×PCR Mix         | 9.5μl      |
| F/R/P              | 3μl        |
| DNA                | 4μl        |
| ddH <sub>2</sub> O | 33.5μl     |
| The total volume   | 50μl       |

**Supply5.2** Two-color fluorescence reaction system

| composition                           | The dosage     |
|---------------------------------------|----------------|
| 10×PCR Mix                            | 9.5μl          |
| F1/R1/P1/F2/R2/P2                     | 3μl            |
| Whole blood DNA/dried blood spots DNA | 2μl/ 3μl       |
| ddH <sub>2</sub> O                    | 35.5μl/ 34.5μl |
| The total volume                      | 50μl           |

**Supply5.3** Monochromatic fluorescence reaction condition

| temperature                                          | time |
|------------------------------------------------------|------|
| 95°C                                                 | 3min |
| 95°C                                                 | 15s  |
| 60°C                                                 | 40s  |
| } Ten cycle                                          |      |
| 95°C                                                 | 15s  |
| 60°C                                                 | 40s  |
| } Thirty cycle, this procedure collects fluorescence |      |

**Supply5.4**Two-color fluorescence reaction condition

| temperature                           | time |
|---------------------------------------|------|
| 95°C                                  | 5min |
| 95°C                                  | 15s  |
| 67°C                                  | 15s  |
| 72°C                                  | 15s  |
| 95°C                                  | 15s  |
| 67°C                                  | 15s  |
| 72°C                                  | 15s  |
| 95°C                                  | 3min |
| 95°C                                  | 15s  |
| } 45 cycles (collection fluorescence) |      |

Each cycle goes down by 1 °C }  
 Each cycle goes down by 1 °C }  
 } Nine cycle  
 no fluorescence collection

60.5°C

30s

---



**Supply6.1** components of monochrome fluorescence method kit

| composition                   | Main ingredients |
|-------------------------------|------------------|
| PCR reaction fluid            | dNTPs etc        |
| Enzyme sofe                   | Taq polymerase   |
| 728 Wild Type Detection Fluid | Primers, Probes  |
| 728 Mutant Detection Fluid    | Primers, Probes  |
| 1197 Wild Test Fluid          | Primers, Probes  |
| 1197 Mutation detection fluid | Primers, Probes  |
| 331 Wild Test Liquid          | Primers, Probes  |
| 331 Mutation detection fluid  | Primers, Probes  |
| 1068 Wild Test Liquid         | Primers, Probes  |
| 1068 Mutation Detection Fluid | Primers, Probes  |
| 611 Wild Test Liquid          | Primers, Probes  |
| 611 Mutation detection fluid  | Primers, Probes  |

**Supply6.1** (continued)

| composition                    | Main ingredients   |
|--------------------------------|--------------------|
| 1238 Wild Test Fluid           | Primers, Probes    |
| 1238 Mutation Detection Fluid  | Primers, Probes    |
| 721 Wild Test Liquid           | Primers, Probes    |
| 721 Mutation detection fluid   | Primers, Probes    |
| 442-1 Wild Test Liquid         | Primers, Probes    |
| 442-1 Mutation detection fluid | Primers, Probes    |
| 158 Wild Test Liquid           | Primers, Probes    |
| 158 Mutation detection fluid   | Primers, Probes    |
| Positive control (PC)          | Plasmid            |
| Blank control (BC)             | ddH <sub>2</sub> O |

**Supply6.2**Composition of two-color fluorescence method kits

| Ingredients            | Tube cover color | Main ingredients |
|------------------------|------------------|------------------|
| PCR reaction fluid     | Yellow           | dNTPs etc        |
| Enzyme sofe            | Purple           | Taq polymerase   |
| Tube 1 detection fluid | Brown            | Primers, Probes  |
| Tube 2 detection fluid | Brown            | Primers, Probes  |
| Tube 3 Detection Fluid | Brown            | Primers, Probes  |
| Tube 4 Detection Fluid | Brown            | Primers, Probes  |

|                        |       |                    |
|------------------------|-------|--------------------|
| Tube 5 Detection Fluid | Brown | Primers, Probes    |
| Positive control (PC)  | Red   | Plasmids           |
| Blank control (BC)     | Green | ddH <sub>2</sub> O |

---

## Supply 7.

**A-1**

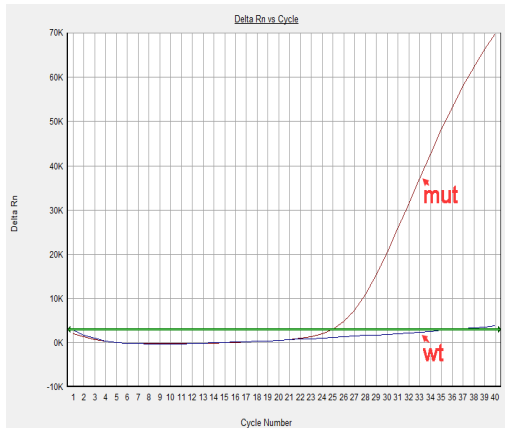

**A-2**

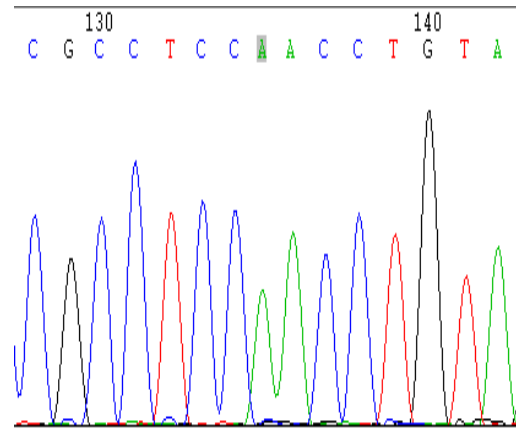

**B-1**

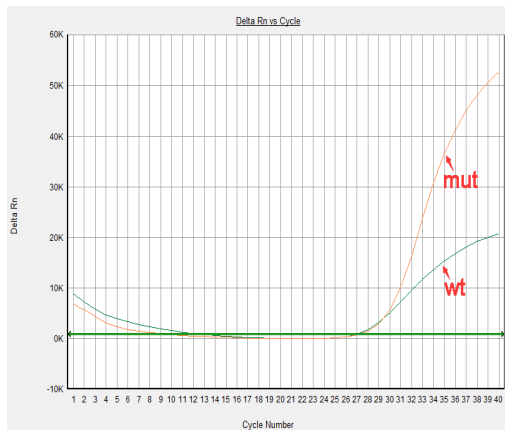

**B-2**

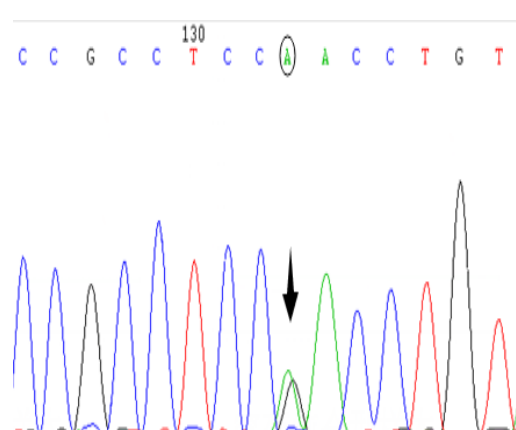

**C-1**

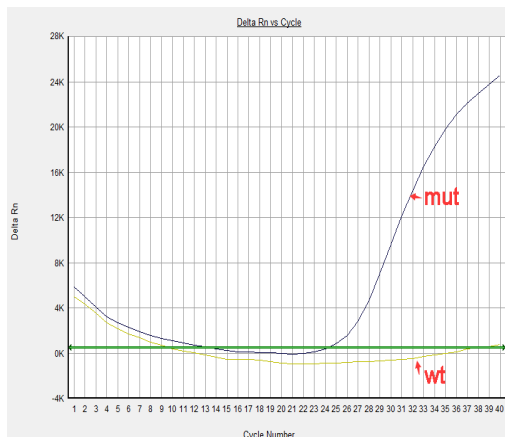

**C-2**

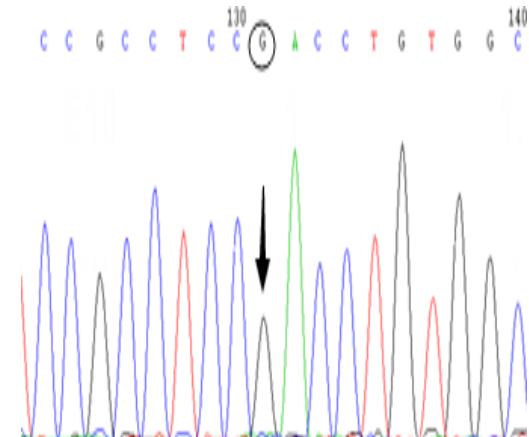

**Figure1.** ARMS-PCR result and Sequencing result diagram of c.728G>A site

(A-1) :ARMS-PCR results of homozygous mutant samples (A-2) :Sequencing results of homozygous mutant samples; (B-1) :ARMS-PCR results of heterozygous mutant samples (B-2) :Sequencing results of heterozygous mutant samples;

(C-1) :ARMS-PCR results of wild-type samples ; (C-2) :Sequencing results of

wild-type samples. ↓ :indicates a mutation site.

**A-1**

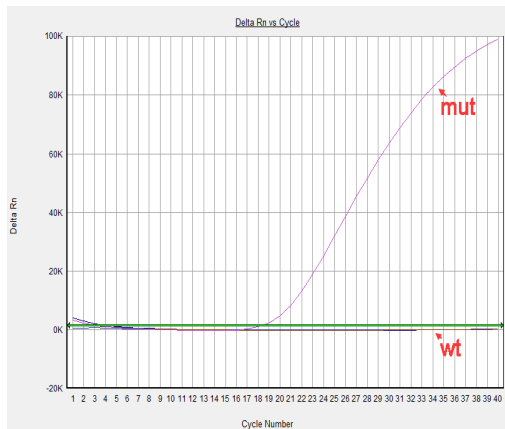

**A-2**

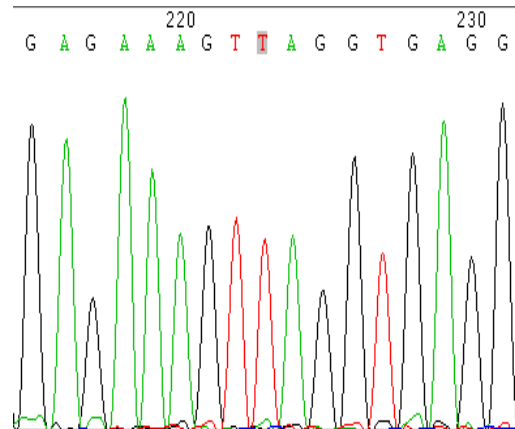

**B-1**

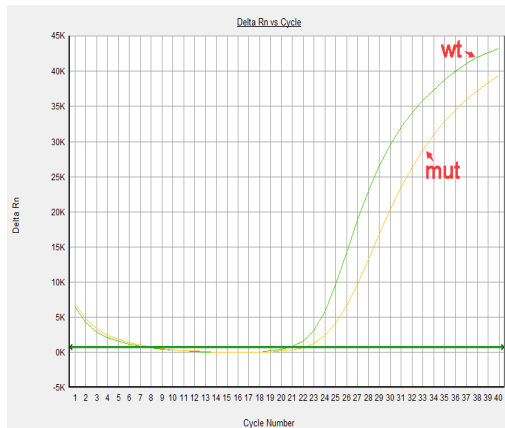

**B-2**

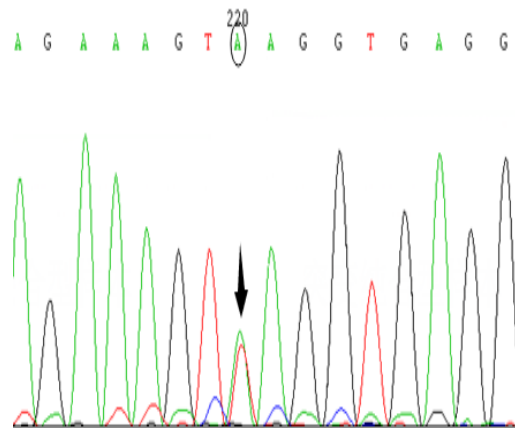

**C-1**

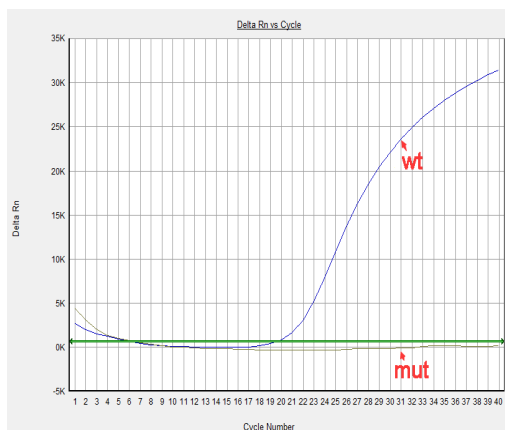

**C-2**

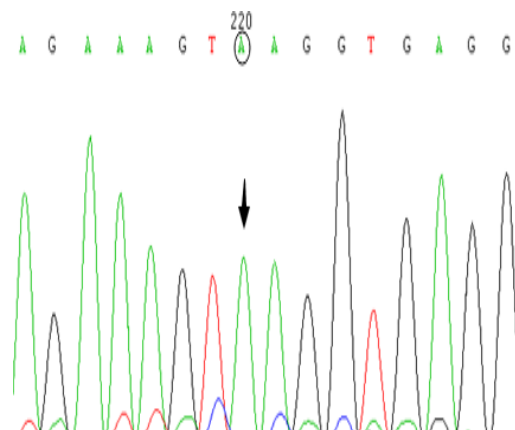

**Figure2.** ARMS-PCR result and Sequencing result diagram of c.1197A>T site.

(A-1) :ARMS-PCR results of homozygous mutant samples; (A-2) :Sequencing results of homozygous mutant samples;

(B-1) :ARMS-PCR results of heterozygous mutant samples; (B-2) :Sequencing results of heterozygous mutant samples; (C-1) :ARMS-PCR results of wild-type samples; (C-2) :Sequencing results of wild-type samples ↓ :indicates a mutation site.

**A-1**

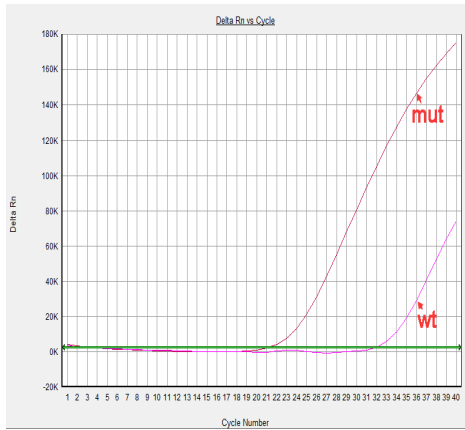

**A-2**

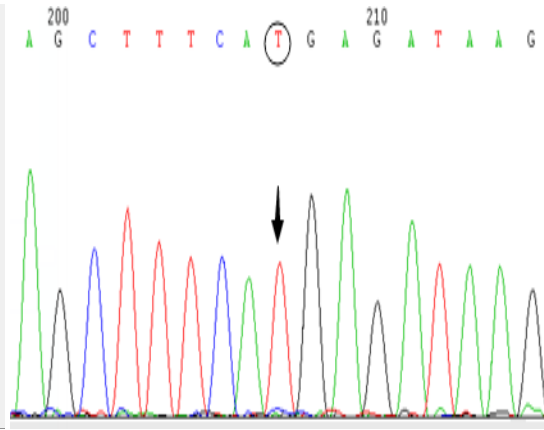

**B-1**

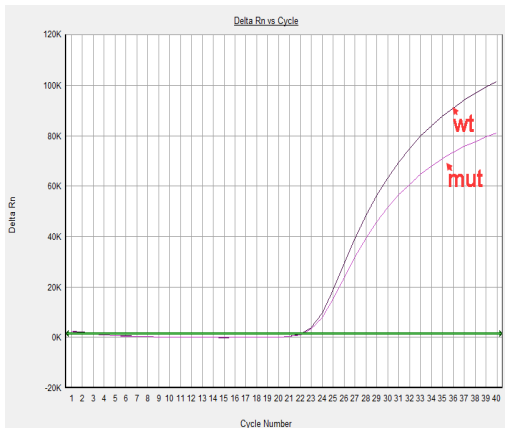

**B-2**

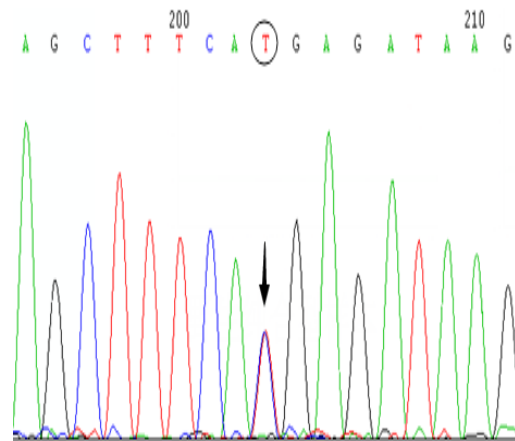

**C-1**

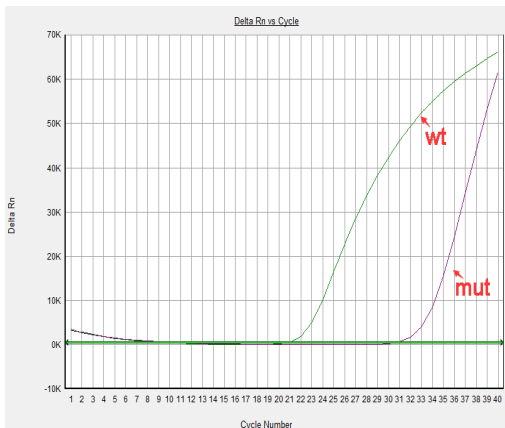

**C-2**

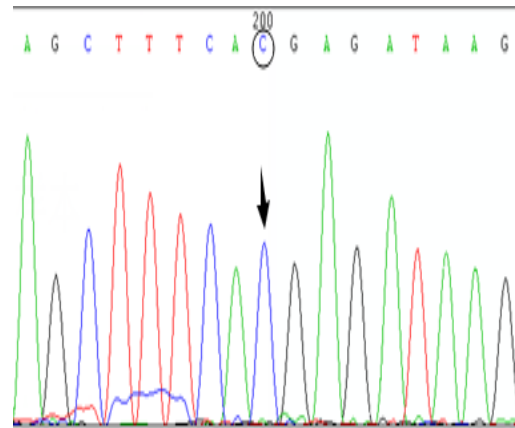

**Figure3.** ARMS-PCR result and Sequencing result diagram of c.331C>T site

(A-1) :ARMS-PCR results of homozygous mutant samples (B-2) :Sequencing results of homozygous mutant samples (B-1) :ARMS-PCR results of heterozygous mutant samples; (B-2) :Sequencing results of heterozygous mutant samples; (C-1) :ARMS-PCR results of wild-type samples; (C-2) :Sequencing results of wild-type samples ↓:indicates a mutation site.

**A-1**

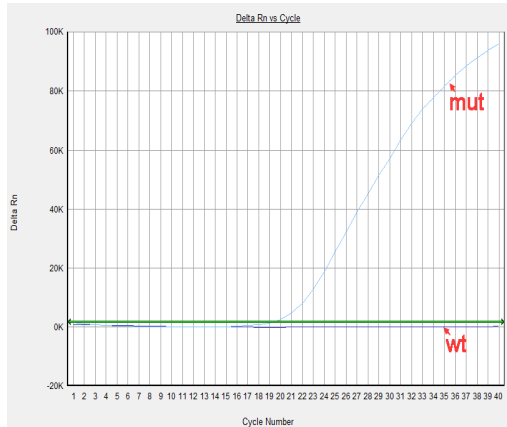

**A-2**

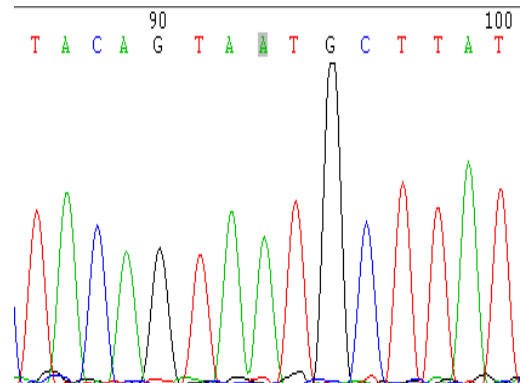

**B-1**

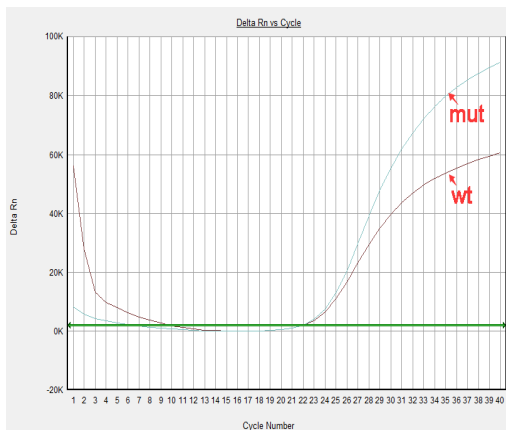

**B-2**

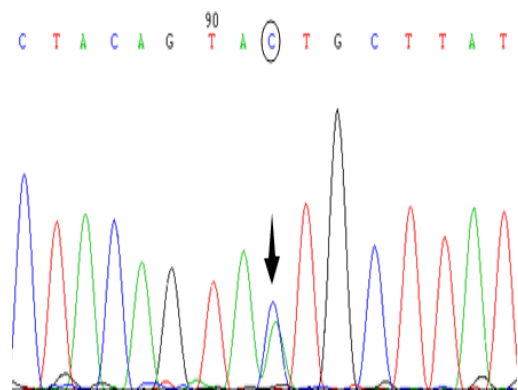

C-1

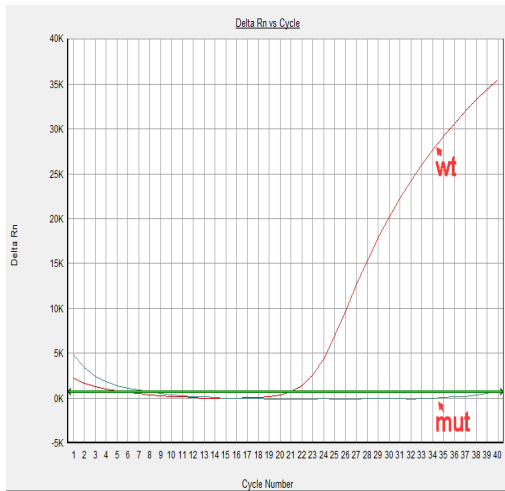

C-2

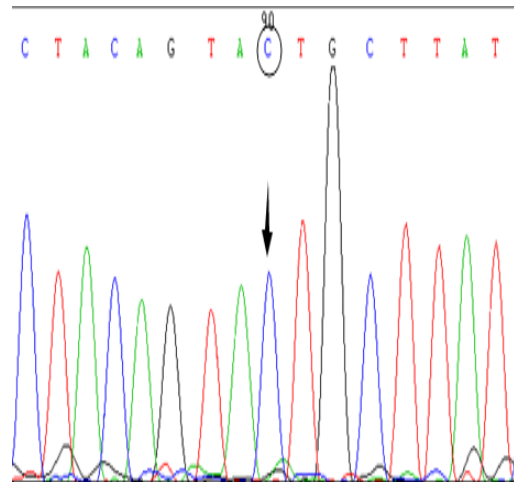

**Figure4.** ARMS-PCR result and Sequencing result diagram of c.1068C>A site

(A-1) :ARMS-PCR results of homozygous mutant samples. (A-2) :Sequencing results of homozygous mutant samples (B-1) :ARMS-PCR results of heterozygous mutant samples. (B-2) :Sequencing results of heterozygous mutant samples

(C-1) :ARMS-PCR results of wild-type samples. (C-2) :Sequencing results of wild-type samples. ↓ :indicates a mutation site.

A-1

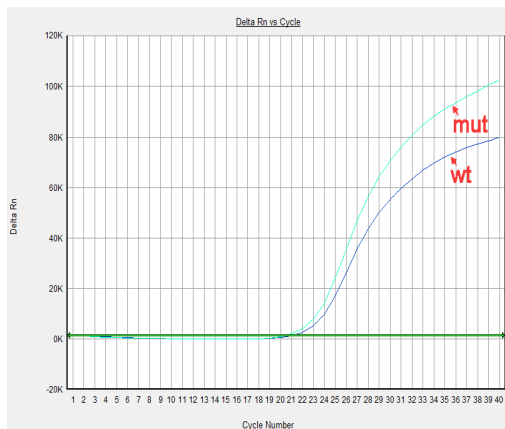

A-2

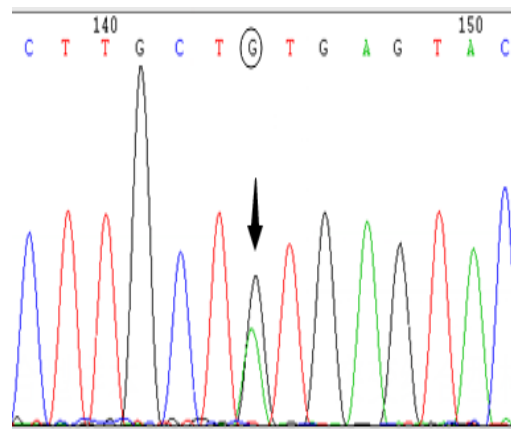

**B-1**

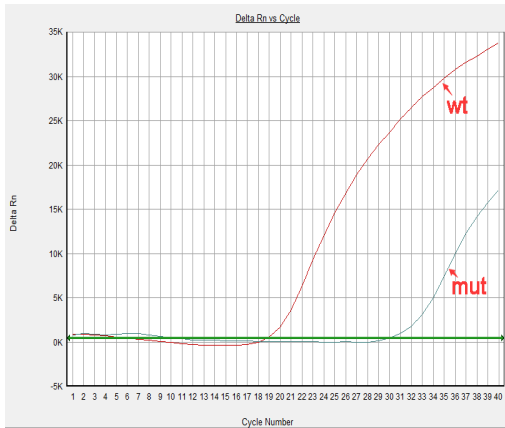

**B-2**

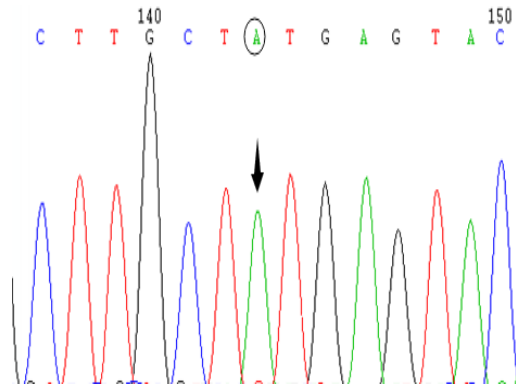

**Figure5.** ARMS-PCR result and Sequencing result diagram of c.611A>G site

(A-1) :ARMS-PCR results of heterozygous mutant samples. (A-2) :Sequencing results of heterozygous mutant samples. (B-1) :ARMS-PCR results of wild-type samples. (B-2) :Sequencing results of wild-type samples. ↓:indicates a mutation site.

**A-1**

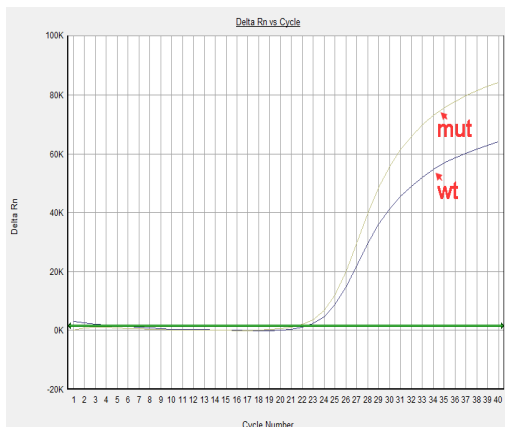

**A-2**

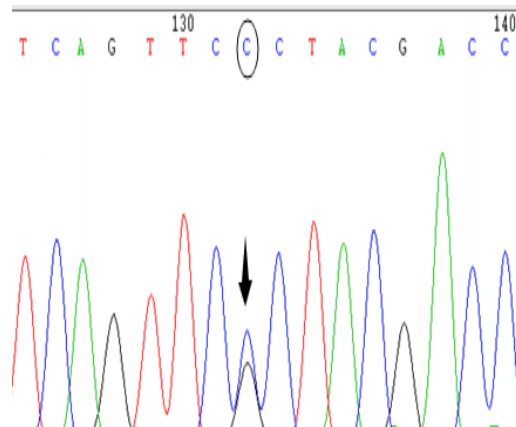

**B-1**

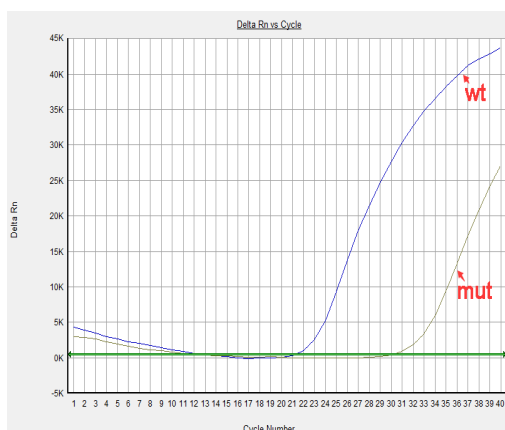

**B-2**

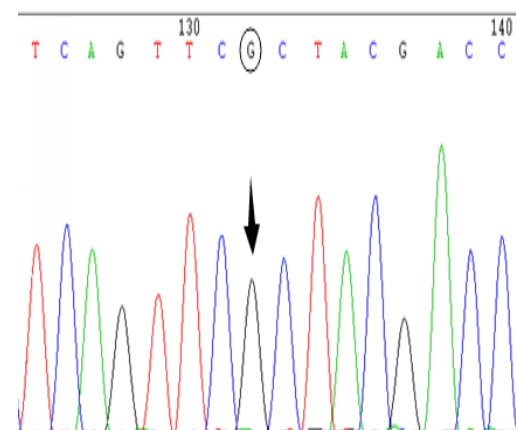

**Figure6.** ARMS-PCR result and Sequencing result diagram of c.1238G>C.



(A-1) :ARMS-PCR results of heterozygous mutant samples. (A-2) :Sequencing results of heterozygous mutant samples. (B-1) :ARMS-PCR results of wild-type samples. (B-2) :Sequencing results of wild-type samples . ↓ indicates a mutation site.

**A-1**

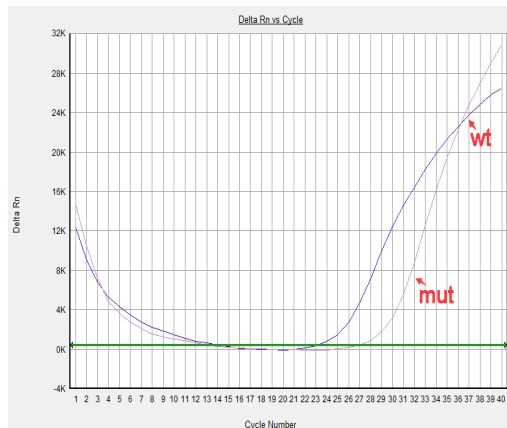

**A-2**

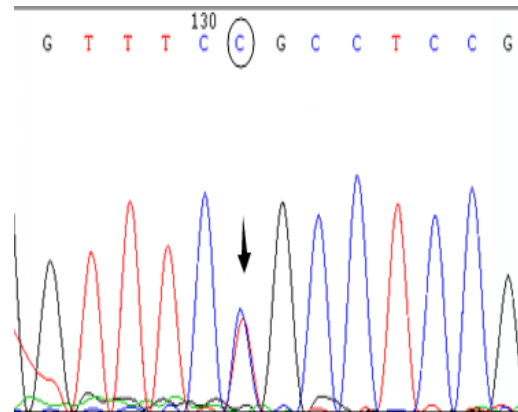

**B-1**

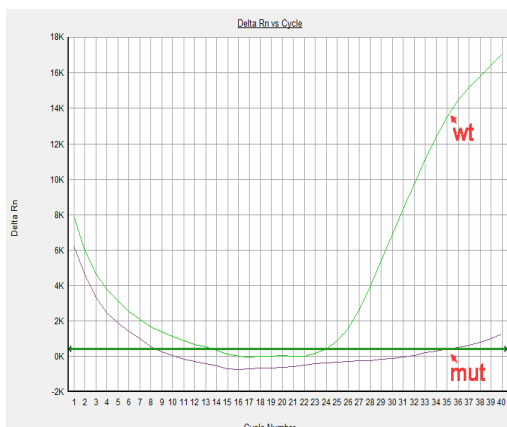

**B-2**

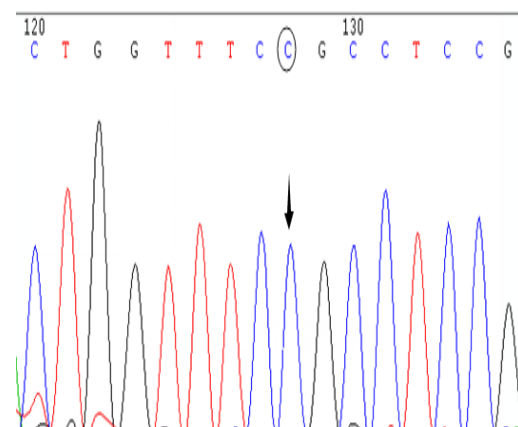

**Figure7.** ARMS-PCR result and Sequencing result diagram of c.721C>T site.

(A-1) :ARMS-PCR results of heterozygous mutant samples. (A-2) :Sequencing results of heterozygous mutant samples. (B-1) :ARMS-PCR results of wild-type samples. (B-2) :Sequencing results of wild-type samples ↓ indicates a mutation site.

**A-1**

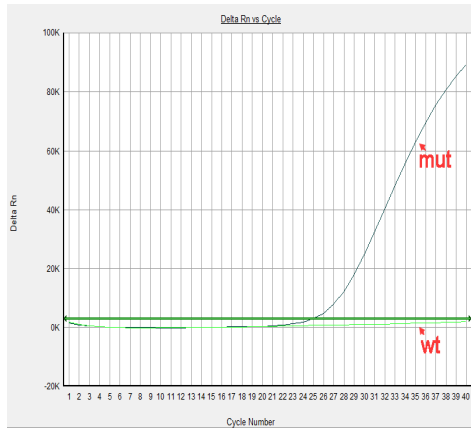

**A-2**

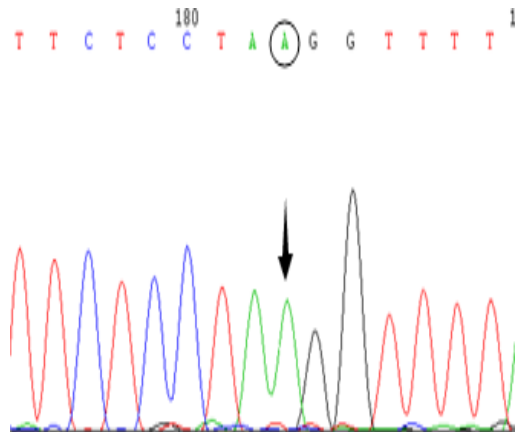

**B-1**

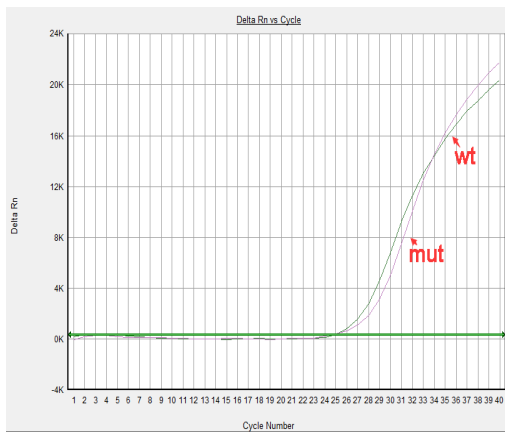

**B-2**

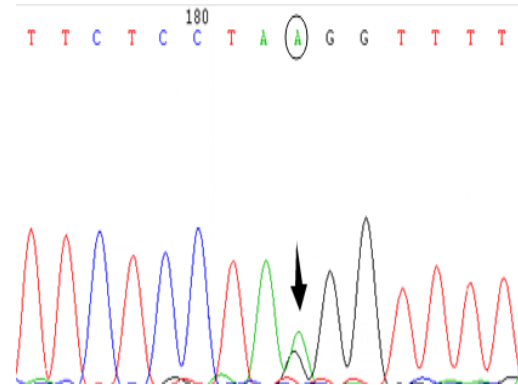

**C-1**

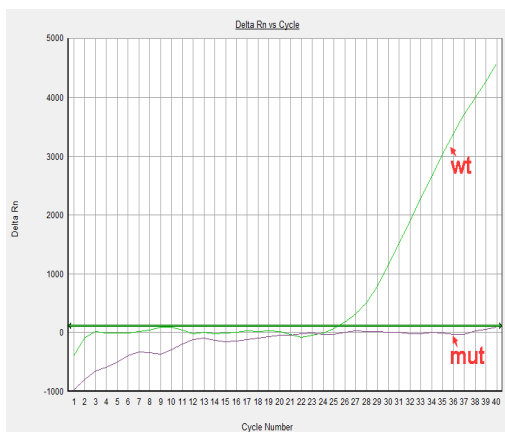

**C-2**

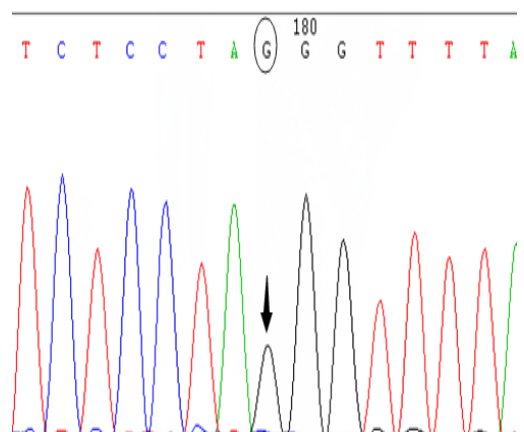

**Figure8.** ARMS-PCR result and Sequencing result diagram of c.442-1G>A site.

(A-1) :ARMS-PCR results of homozygous mutant samples. (A-2) :Sequencing results of homozygous mutant samples

(B-1) :ARMS-PCR results of heterozygous mutant samples. (B-2) :Sequencing results of heterozygous mutant samples. (C-1) :ARMS-PCR results of wild-type samples. (C-2) :Sequencing results of wild-type samples ↓ indicates a mutation site.

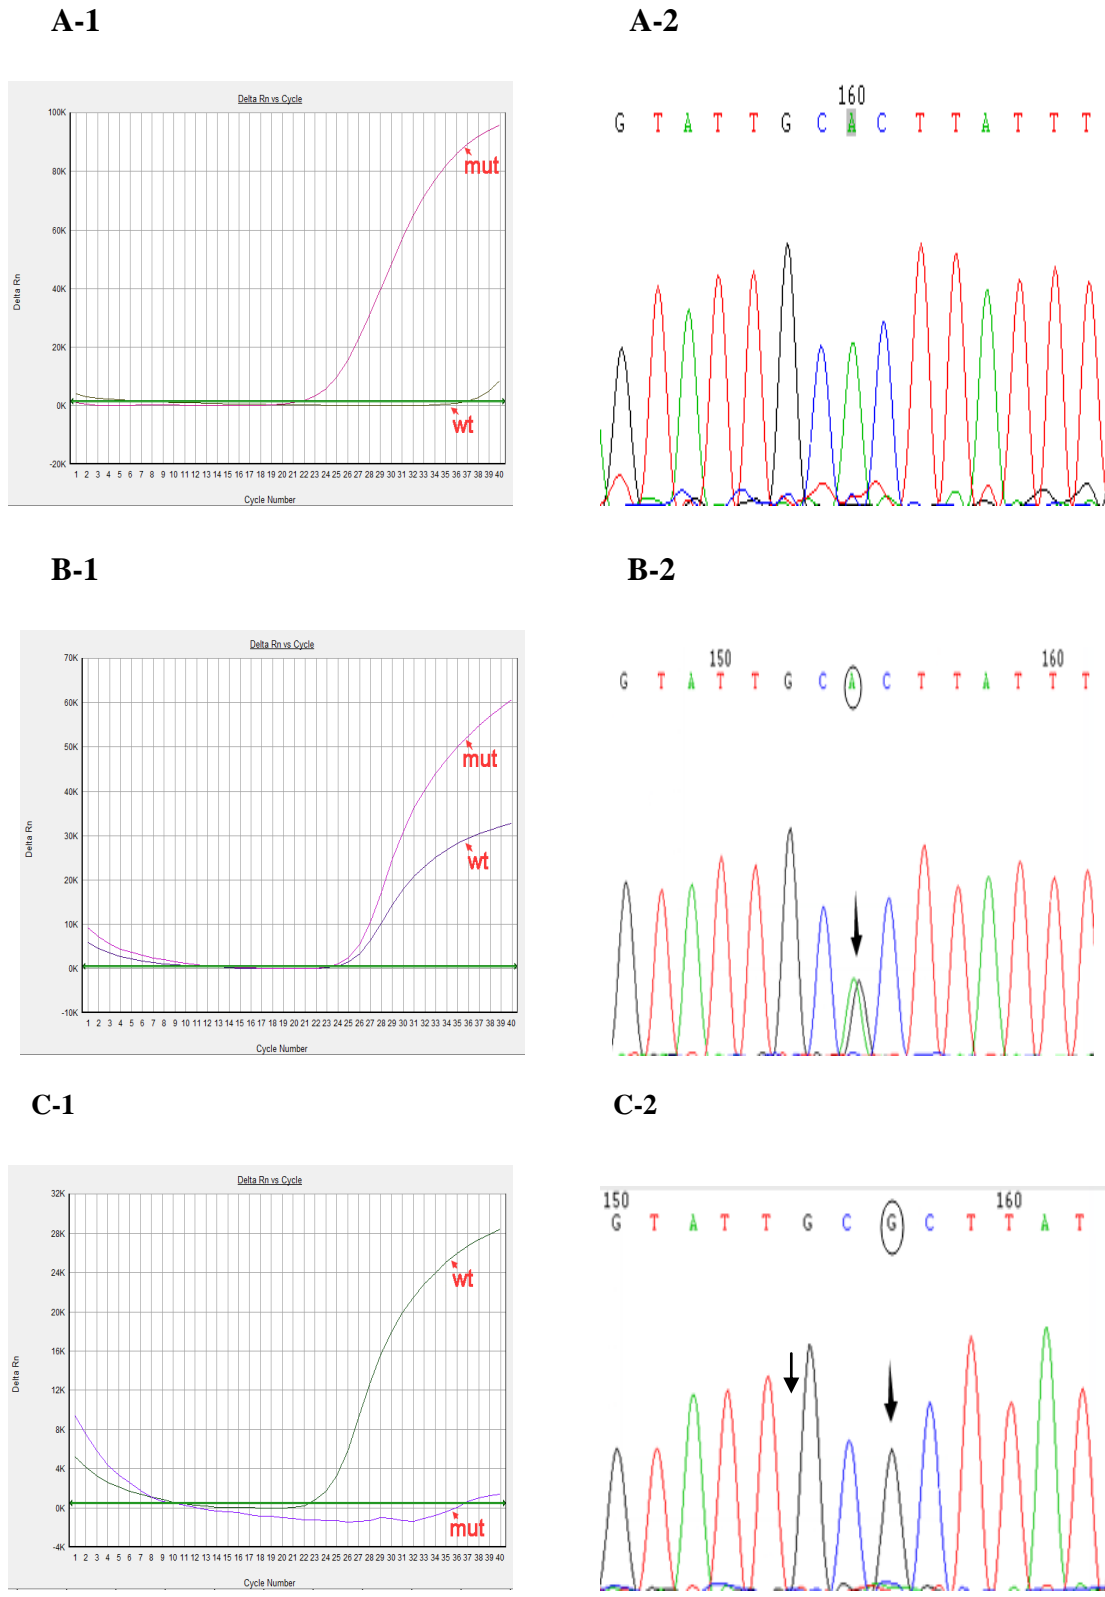

**Figure9.** ARMS-PCR result and Sequencing result diagram of c.158G>A site.

(A-1) :ARMS-PCR results of homozygous mutant samples; (A-2) :Sequencing results of homozygous mutant samples; (B-1) ARMS-PCR results of heterozygous mutant samples; (B-2) Sequencing results of heterozygous mutant samples  
(C-1) :ARMS-PCR results of wild-type samples; (C-2) :Sequencing results of wild-type samples. ↓:indicates a mutation site.

Supply8.

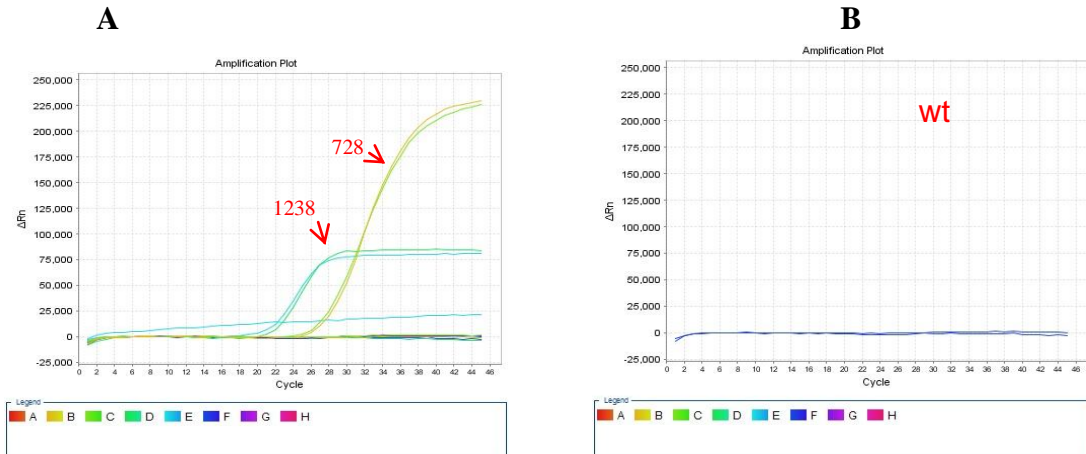

Figure1. ARMS-PCR results of c.728G>A+c.1238G>C site.

(A) Graph of positive sample amplification results (B) Results of wild-type sample amplification ↓ : indicates a mutation site

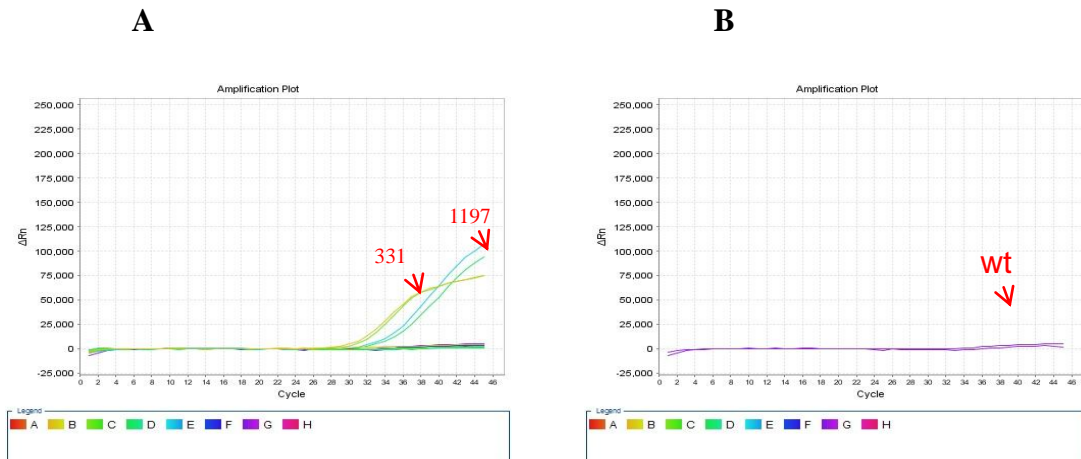

Figure 2. ARMS-PCR results of c.331C>T+c.1197A>T site

(A) Graph of positive sample amplification results. (B) Results of wild-type sample amplification. ↓ : indicates a mutation site.

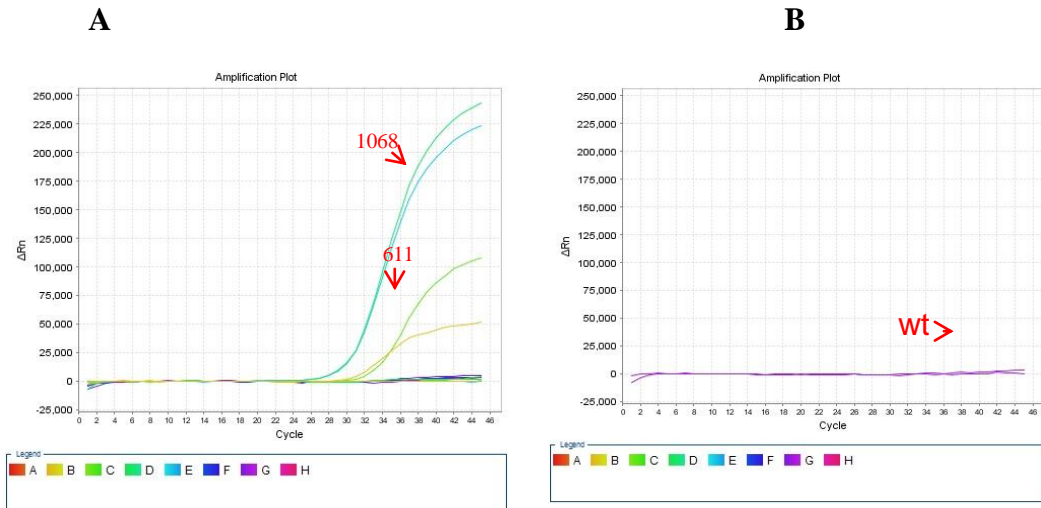

**Figure 3.** ARMS-PCR results of c.611A>G+c.1068C>A site  
 (A) Graph of positive sample amplification results (B) Results of wild-type sample amplification ↓: indicates a mutation site.

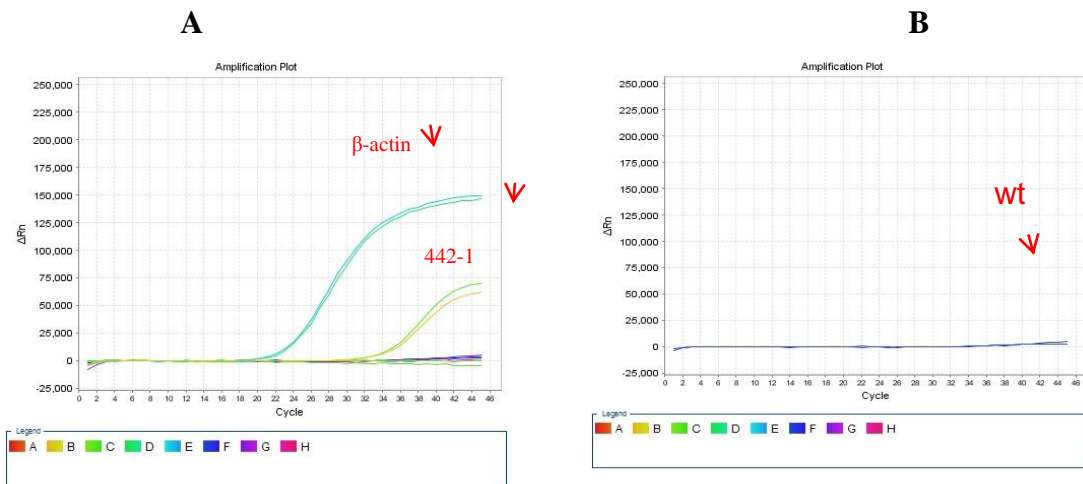

**Figure 4.** ARMS-PCR results of c.442-1G>A+β-actin site.  
 (A) :Graph of positive sample amplification results (B) :Results of wild-type sample amplification ↓: indicates a mutation site.

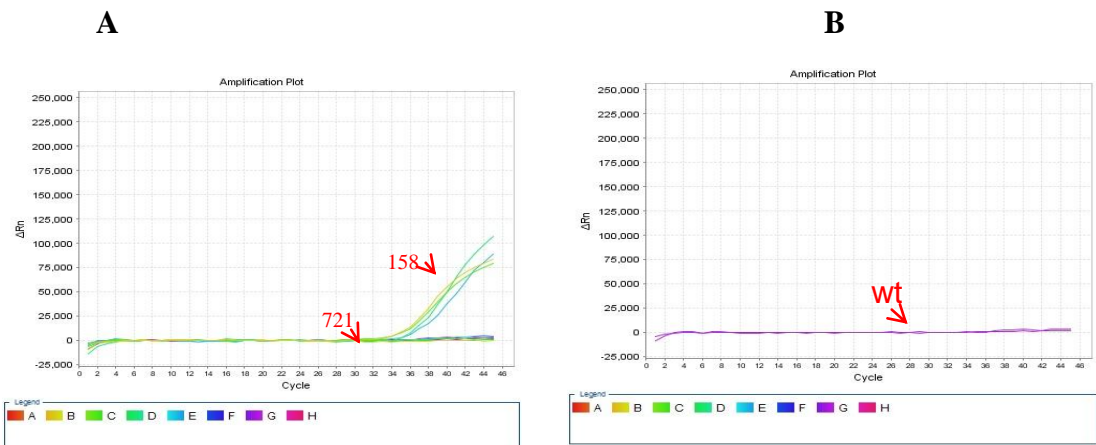

**Figure5.** ARMS-PCR results of c.721C>T+c.158G>A site.

(A) :Graph of positive sample amplification results. (B) :Results of wild-type sample amplification. ↓ : indicates a mutation site.

## Supply9.

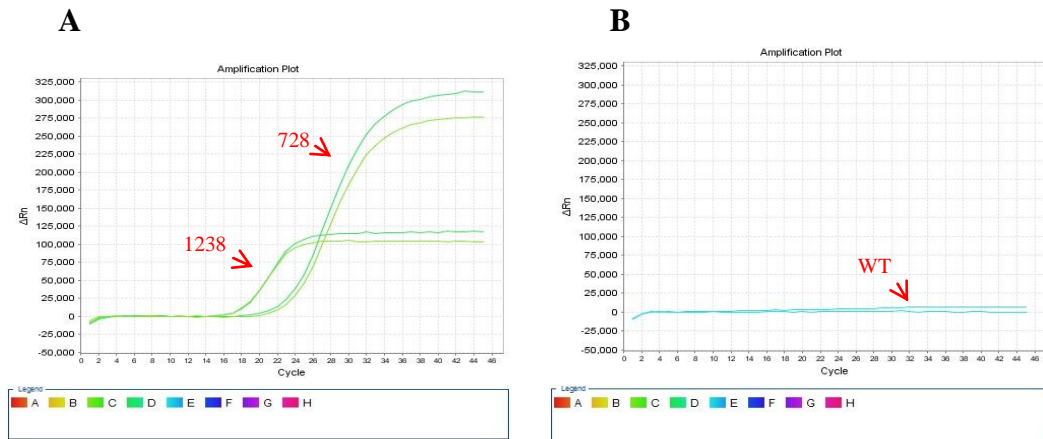

**Figure1.** ARMS-PCR results of c.728G>A+c.1238G>C site.

(A) Graph of positive sample amplification results (B) Results of wild-type sample amplification ↓ : indicates a mutation site

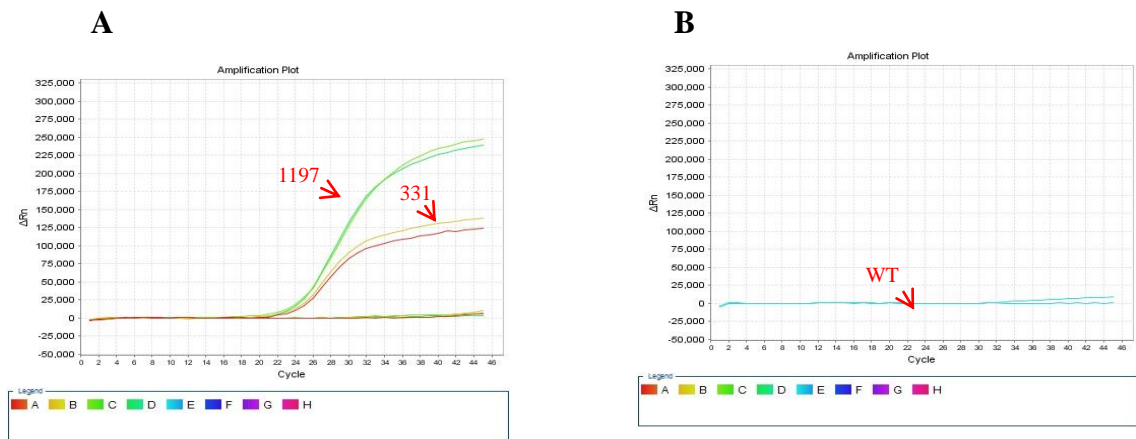

**Figure 2.** ARMS-PCR results of c.331C>T+c.1197A>T site

(A) Graph of positive sample amplification results. (B) Results of wild-type sample amplification. ↓ : indicates a mutation site.



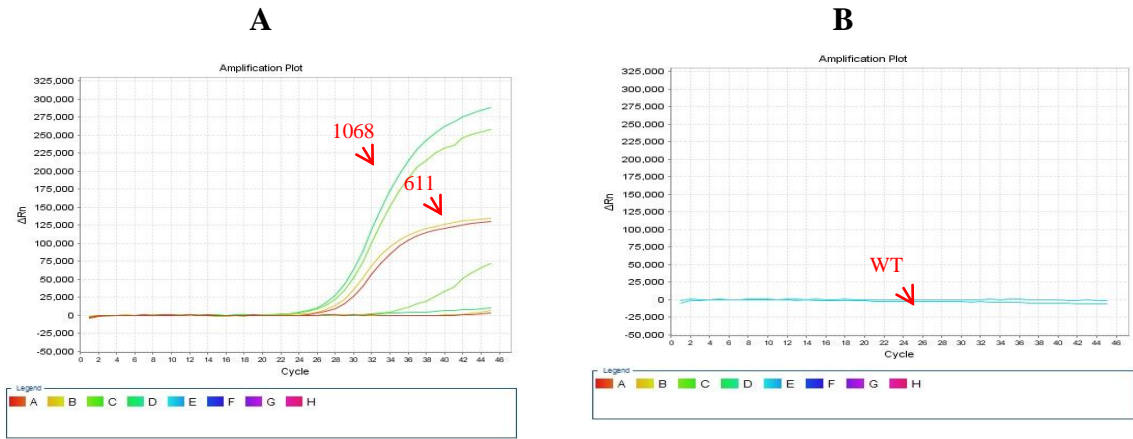

**Figure 3.** ARMS-PCR results of c.611A>G+c.1068C>A site  
 (A) Graph of positive sample amplification results (B) Results of wild-type sample amplification ↓: indicates a mutation site.

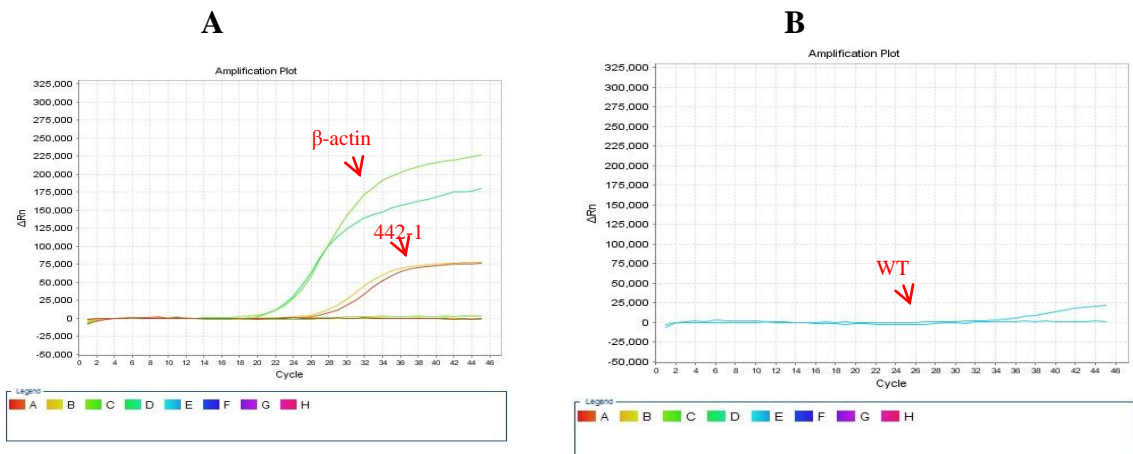

**Figure 4.** ARMS-PCR results of c.442-1G>A+β-actin site.  
 (A) :Graph of positive sample amplification results (B) :Results of wild-type sample amplification ↓: indicates a mutation site.

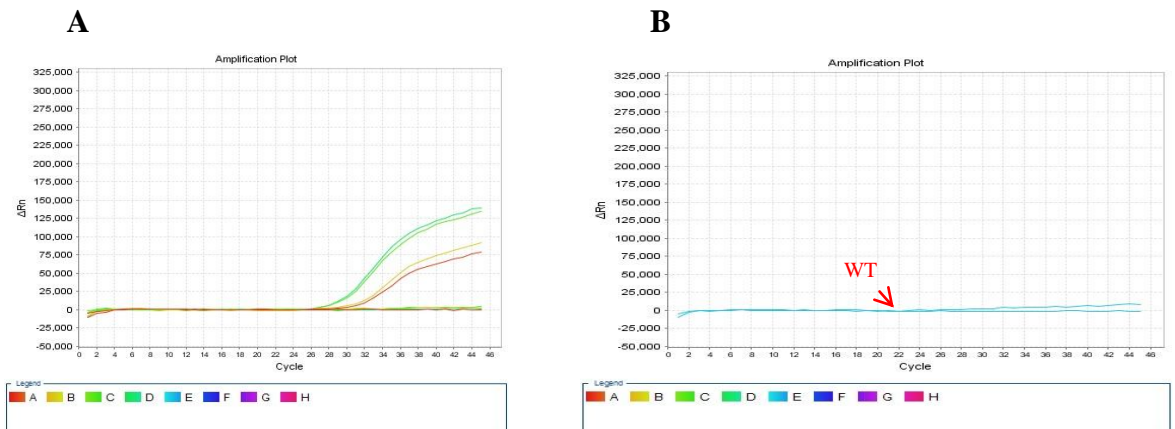

**Figure5.** ARMS-PCR results of c.721C>T+c.158G>A site.

(A) :Graph of positive sample amplification results. (B) :Results of wild-type sample amplification. ↓ : indicates a mutation site.
